# Supplementary material for: The Microwave Rotational Electric Resonance (RER) Spectrum of Benzothiazole
Source: MDPI journal article supplement (doi:10.3390/molecules28083419), 2023-04-13
Supplement: s1 [file s1]

**Table S1.** The rotational constants  $A$ ,  $B$ ,  $C$  (in MHz) of benzothiazole calculated at different levels of theory and their deviations to the experimental values (exp. – calc.)  $\Delta A$ ,  $\Delta B$ , and  $\Delta C$ , respectively (in MHz).

| Level of theory          | $A$    | $\Delta A$ | $B$    | $\Delta B$ | $C$   | $\Delta C$ |
|--------------------------|--------|------------|--------|------------|-------|------------|
| MP2/6-31G(d,p)           | 3166.6 | 8.0        | 1338.7 | 3.1        | 940.9 | 2.3        |
| MP2/6-31+G(d,p)          | 3163.7 | 11.0       | 1335.9 | 5.9        | 939.3 | 4.0        |
| MP2/6-31++G(d,p)         | 3163.6 | 11.0       | 1335.9 | 5.9        | 939.3 | 4.0        |
| MP2/6-311G(d,p)          | 3161.7 | 12.9       | 1338.3 | 3.4        | 940.3 | 2.9        |
| MP2/6-311+G(d,p)         | 3160.1 | 14.5       | 1335.9 | 5.8        | 939.0 | 4.3        |
| MP2/6-311++G(d,p)        | 3160.1 | 14.5       | 1335.9 | 5.8        | 939.0 | 4.3        |
| MP2/6-311G(2d,2p)        | 3168.5 | 6.2        | 1340.6 | 1.1        | 942.0 | 1.2        |
| MP2/6-311+G(2d,2p)       | 3169.4 | 5.2        | 1339.5 | 2.3        | 941.6 | 1.7        |
| MP2/6-311++G(2d,2p)      | 3169.4 | 5.2        | 1339.5 | 2.3        | 941.6 | 1.7        |
| MP2/6-311G(df,pd)        | 3183.8 | −9.2       | 1347.6 | −5.8       | 946.8 | −3.6       |
| MP2/6-311+G(df,pd)       | 3181.1 | −6.5       | 1345.3 | −3.5       | 945.5 | −2.2       |
| MP2/6-311++G(df,pd)      | 3180.9 | −6.3       | 1345.3 | −3.5       | 945.4 | −2.2       |
| MP2/6-311G(2df,2pd)      | 3186.8 | −12.2      | 1349.5 | −7.7       | 948.0 | −4.8       |
| MP2/6-311+G(2df,2pd)     | 3186.6 | −12.0      | 1347.9 | −6.1       | 947.2 | −4.0       |
| MP2/6-311++G(2df,2pd)    | 3186.6 | −12.0      | 1347.9 | −6.1       | 947.2 | −4.0       |
| MP2/6-311G(3df,3pd)      | 3189.9 | −15.3      | 1350.4 | −8.7       | 948.8 | −5.5       |
| MP2/6-311+G(3df,3pd)     | 3188.8 | −14.2      | 1349.5 | −7.7       | 948.2 | −5.0       |
| MP2/6-311++G(3df,3pd)    | 3188.7 | −14.1      | 1349.5 | −7.7       | 948.2 | −5.0       |
| MP2/cc-pVDZ              | 3123.4 | 51.2       | 1324.9 | 16.9       | 930.3 | 13.0       |
| MP2/aug-cc-pVDZ          | 3115.6 | 59.0       | 1321.5 | 20.3       | 927.9 | 15.3       |
| MP2/cc-pVTZ              | 3179.9 | −5.3       | 1346.3 | −4.5       | 945.8 | −2.6       |
| MP2/aug-cc-pVTZ          | 3179.1 | −4.4       | 1345.6 | −3.8       | 945.4 | −2.2       |
| B3LYP-D3/6-31G(d,p)      | 3154.0 | 20.7       | 1330.6 | 11.2       | 935.8 | 7.5        |
| B3LYP-D3/6-31+G(d,p)     | 3153.3 | 21.3       | 1328.5 | 13.3       | 934.7 | 8.5        |
| B3LYP-D3/6-31++G(d,p)    | 3153.3 | 21.4       | 1328.5 | 13.2       | 934.7 | 8.5        |
| B3LYP-D3/6-311G(d,p)     | 3165.9 | 8.8        | 1334.0 | 7.7        | 938.6 | 4.7        |
| B3LYP-D3/6-311+G(d,p)    | 3166.3 | 8.3        | 1333.1 | 8.6        | 938.1 | 5.1        |
| B3LYP-D3/6-311++G(d,p)   | 3166.2 | 8.4        | 1333.1 | 8.6        | 938.1 | 5.1        |
| B3LYP-D3/6-311G(2d,2p)   | 3179.5 | −4.9       | 1338.7 | 3.1        | 942.0 | 1.2        |
| B3LYP-D3/6-311+G(2d,2p)  | 3180.5 | −5.9       | 1337.9 | 3.8        | 941.8 | 1.5        |
| B3LYP-D3/6-311++G(2d,2p) | 3180.5 | −5.9       | 1337.9 | 3.8        | 941.8 | 1.5        |
| B3LYP-D3/6-311G(df,pd)   | 3177.3 | −2.7       | 1338.1 | 3.7        | 941.6 | 1.7        |
| B3LYP-D3/6-311+G(df,pd)  | 3178.0 | −3.4       | 1337.2 | 4.6        | 941.2 | 2.1        |
| B3LYP-D3/6-311++G(df,pd) | 3178.0 | −3.3       | 1337.2 | 4.6        | 941.2 | 2.1        |
| B3LYP-D3/6-311G(2df,2pd) | 3187.6 | −12.9      | 1341.7 | 0.1        | 944.3 | −1.0       |

|                              |        |       |        |      |       |      |
|------------------------------|--------|-------|--------|------|-------|------|
| B3LYP-D3/6-311+G(2df,2pd)    | 3188.4 | -13.8 | 1340.9 | 0.9  | 943.9 | -0.7 |
| B3LYP-D3/6-311++G(2df,2pd)   | 3188.4 | -13.8 | 1340.9 | 0.9  | 943.9 | -0.7 |
| B3LYP-D3/6-311G(3df,3pd)     | 3192.1 | -17.5 | 1343.0 | -1.2 | 945.3 | -2.0 |
| B3LYP-D3/6-311+G(3df,3pd)    | 3192.5 | -17.9 | 1342.5 | -0.8 | 945.1 | -1.9 |
| B3LYP-D3/6-311++G(3df,3pd)   | 3192.4 | -17.8 | 1342.5 | -0.8 | 945.1 | -1.9 |
| B3LYP-D3/cc-pVDZ             | 3142.5 | 32.1  | 1326.5 | 15.3 | 932.7 | 10.5 |
| B3LYP-D3/aug-cc-pVDZ         | 3145.2 | 29.5  | 1326.0 | 15.8 | 932.7 | 10.5 |
| B3LYP-D3/cc-pVTZ             | 3185.2 | -10.6 | 1340.3 | 1.5  | 943.3 | -0.1 |
| B3LYP-D3/aug-cc-pVTZ         | 3186.0 | -11.3 | 1340.2 | 1.6  | 943.4 | -0.1 |
| B3LYP-D3BJ/6-31G(d,p)        | 3156.9 | 17.8  | 1331.4 | 10.4 | 936.5 | 6.8  |
| B3LYP-D3BJ/6-31+G(d,p)       | 3156.2 | 18.4  | 1329.4 | 12.4 | 935.4 | 7.8  |
| B3LYP-D3BJ/6-31++G(d,p)      | 3156.2 | 18.5  | 1329.4 | 12.4 | 935.4 | 7.8  |
| B3LYP-D3BJ/6-311G(d,p)       | 3168.2 | 6.4   | 1335.1 | 6.7  | 939.3 | 4.0  |
| B3LYP-D3BJ/6-311+G(d,p)      | 3168.7 | 5.9   | 1334.2 | 7.6  | 938.9 | 4.4  |
| B3LYP-D3BJ/6-311++G(d,p)     | 3168.6 | 6.0   | 1334.2 | 7.6  | 938.9 | 4.4  |
| B3LYP-D3BJ/6-311G(2d,2p)     | 3182.2 | -7.5  | 1339.4 | 2.4  | 942.6 | 0.6  |
| B3LYP-D3BJ/6-311+G(2d,2p)    | 3182.6 | -8.0  | 1338.9 | 2.8  | 942.4 | 0.8  |
| B3LYP-D3BJ/6-311++G(2d,2p)   | 3182.6 | -7.9  | 1338.9 | 2.8  | 942.4 | 0.8  |
| B3LYP-D3BJ/6-311G(df,pd)     | 3180.0 | -5.4  | 1338.8 | 3.0  | 942.2 | 1.1  |
| B3LYP-D3BJ/6-311+G(df,pd)    | 3180.7 | -6.0  | 1338.0 | 3.8  | 941.8 | 1.5  |
| B3LYP-D3BJ/6-311++G(df,pd)   | 3180.6 | -6.0  | 1338.0 | 3.8  | 941.8 | 1.5  |
| B3LYP-D3BJ/6-311G(2df,2pd)   | 3190.1 | -15.5 | 1342.4 | -0.6 | 944.8 | -1.6 |
| B3LYP-D3BJ/6-311+G(2df,2pd)  | 3190.9 | -16.3 | 1341.6 | 0.2  | 944.5 | -1.3 |
| B3LYP-D3BJ/6-311++G(2df,2pd) | 3190.9 | -16.3 | 1341.6 | 0.2  | 944.5 | -1.3 |
| B3LYP-D3BJ/6-311G(3df,3pd)   | 3194.6 | -20.0 | 1343.6 | -1.9 | 945.8 | -2.6 |
| B3LYP-D3BJ/6-311+G(3df,3pd)  | 3195.0 | -20.4 | 1343.2 | -1.5 | 945.7 | -2.4 |
| B3LYP-D3BJ/6-311++G(3df,3pd) | 3194.9 | -20.3 | 1343.2 | -1.5 | 945.7 | -2.4 |
| B3LYP-D3BJ/cc-pVDZ           | 3145.6 | 29.1  | 1327.4 | 14.4 | 933.5 | 9.8  |
| B3LYP-D3BJ/aug-cc-pVDZ       | 3148.2 | 26.4  | 1326.9 | 14.9 | 933.5 | 9.8  |
| B3LYP-D3BJ/cc-pVTZ           | 3187.8 | -13.2 | 1341.0 | 0.8  | 943.9 | -0.7 |
| B3LYP-D3BJ/aug-cc-pVTZ       | 3188.5 | -13.9 | 1340.9 | 0.9  | 943.9 | -0.7 |
| M06-2X/6-31G(d,p)            | 3181.4 | -6.7  | 1341.0 | 0.8  | 943.3 | -0.1 |
| M06-2X/6-31+G(d,p)           | 3180.0 | -5.4  | 1339.4 | 2.3  | 942.5 | 0.8  |
| M06-2X/6-31++G(d,p)          | 3180.0 | -5.4  | 1339.4 | 2.3  | 942.5 | 0.8  |
| M06-2X/6-311G(d,p)           | 3190.3 | -15.7 | 1344.0 | -2.2 | 945.6 | -2.4 |
| M06-2X/6-311+G(d,p)          | 3190.4 | -15.8 | 1343.1 | -1.4 | 945.2 | -2.0 |
| M06-2X/6-311++G(d,p)         | 3190.3 | -15.7 | 1343.1 | -1.4 | 945.2 | -2.0 |
| M06-2X/6-311G(df,pd)         | 3199.7 | -25.1 | 1347.2 | -5.5 | 948.1 | -4.8 |
| M06-2X/6-311+G(df,pd)        | 3200.1 | -25.5 | 1346.4 | -4.7 | 947.7 | -4.5 |
| M06-2X/6-311++G(df,pd)       | 3200.1 | -25.4 | 1346.4 | -4.7 | 947.7 | -4.5 |
| M06-2X/6-311G(3df,3pd)       | 3212.0 | -37.3 | 1351.4 | -9.7 | 951.2 | -8.0 |

|                                  |        |       |        |      |       |      |
|----------------------------------|--------|-------|--------|------|-------|------|
| M06-2X/6-311+G(3df,3pd)          | 3212.0 | -37.4 | 1351.1 | -9.3 | 951.0 | -7.8 |
| M06-2X/6-311++G(3df,3pd)         | 3212.0 | -37.4 | 1351.0 | -9.3 | 951.0 | -7.8 |
| M06-2X/cc-pVDZ                   | 3171.7 | 2.9   | 1337.8 | 4.0  | 940.9 | 2.3  |
| M06-2X/aug-cc-pVDZ               | 3173.1 | 1.5   | 1337.4 | 4.4  | 940.8 | 2.4  |
| M06-2X/cc-pVTZ                   | 3207.1 | -32.5 | 1349.2 | -7.5 | 949.7 | -6.5 |
| M06-2X/aug-cc-pVTZ               | 3207.7 | -33.1 | 1349.3 | -7.6 | 949.8 | -6.6 |
| M06-2X-D3/6-31G(d,p)             | 3181.3 | -6.7  | 1340.9 | 0.9  | 943.3 | -0.1 |
| M06-2X-D3/6-31+G(d,p)            | 3180.0 | -5.3  | 1339.4 | 2.4  | 942.4 | 0.8  |
| M06-2X-D3/6-31++G(d,p)           | 3179.9 | -5.3  | 1339.4 | 2.4  | 942.4 | 0.8  |
| M06-2X-D3/6-311G(d,p)            | 3190.2 | -15.6 | 1344.0 | -2.2 | 945.6 | -2.4 |
| M06-2X-D3/6-311+G(d,p)           | 3190.3 | -15.7 | 1343.1 | -1.3 | 945.2 | -2.0 |
| M06-2X-D3/6-311++G(d,p)          | 3190.3 | -15.6 | 1343.1 | -1.3 | 945.2 | -1.9 |
| M06-2X-D3/6-311G(2d,2p)          | 3201.8 | -27.1 | 1348.0 | -6.3 | 948.6 | -5.4 |
| M06-2X-D3/6-311+G(2d,2p)         | 3202.4 | -27.8 | 1347.3 | -5.6 | 948.3 | -5.1 |
| M06-2X-D3/6-311++G(2d,2p)        | 3202.4 | -27.8 | 1347.3 | -5.6 | 948.3 | -5.1 |
| M06-2X-D3/6-311G(df,pd)          | 3199.7 | -25.0 | 1347.2 | -5.4 | 948.0 | -4.8 |
| M06-2X-D3/6-311+G(df,pd)         | 3200.0 | -25.4 | 1346.4 | -4.6 | 947.7 | -4.4 |
| M06-2X-D3/6-311G(2df,2pd)        | 3209.1 | -34.5 | 1350.5 | -8.8 | 950.5 | -7.3 |
| M06-2X-D3/6-311+G(2df,2pd)       | 3209.5 | -34.9 | 1349.8 | -8.0 | 950.2 | -6.9 |
| M06-2X-D3/6-311++G(2df,2pd)      | 3209.5 | -34.9 | 1349.8 | -8.0 | 950.2 | -6.9 |
| M06-2X-D3/6-311G(3df,3pd)        | 3211.9 | -37.3 | 1351.4 | -9.6 | 951.2 | -7.9 |
| M06-2X-D3/6-311+G(3df,3pd)       | 3211.9 | -37.3 | 1351.0 | -9.3 | 951.0 | -7.8 |
| M06-2X-D3/6-311++G(3df,3pd)      | 3211.9 | -37.3 | 1351.0 | -9.2 | 951.0 | -7.8 |
| M06-2X-D3/cc-pVDZ                | 3171.6 | 3.0   | 1337.8 | 4.0  | 940.9 | 2.3  |
| M06-2X-D3/aug-cc-pVDZ            | 3173.1 | 1.6   | 1337.3 | 4.4  | 940.8 | 2.4  |
| M06-2X-D3/cc-pVTZ                | 3207.0 | -32.4 | 1349.2 | -7.4 | 949.7 | -6.4 |
| M06-2X-D3/aug-cc-pVTZ            | 3207.7 | -33.0 | 1349.3 | -7.5 | 949.8 | -6.5 |
| $\omega$ B97X-D/6-31G(d,p)       | 3194.5 | -19.9 | 1344.1 | -2.4 | 946.1 | -2.8 |
| $\omega$ B97X-D/6-31+G(d,p)      | 3194.9 | -20.3 | 1343.2 | -1.4 | 945.6 | -2.4 |
| $\omega$ B97X-D/6-31++G(d,p)     | 3194.8 | -20.2 | 1343.2 | -1.4 | 945.6 | -2.4 |
| $\omega$ B97X-D/6-311G(d,p)      | 3194.9 | -20.3 | 1343.2 | -1.4 | 945.6 | -2.4 |
| $\omega$ B97X-D/6-311+G(d,p)     | 3194.8 | -20.2 | 1343.2 | -1.4 | 945.6 | -2.4 |
| $\omega$ B97X-D/6-311++G(d,p)    | 3194.5 | -19.9 | 1344.1 | -2.4 | 946.1 | -2.8 |
| $\omega$ B97X-D/6-311G(2d,2p)    | 3207.1 | -32.5 | 1348.6 | -6.9 | 949.4 | -6.2 |
| $\omega$ B97X-D/6-311+G(2d,2p)   | 3208.0 | -33.3 | 1347.9 | -6.1 | 949.1 | -5.9 |
| $\omega$ B97X-D/6-311++G(2d,2p)  | 3207.9 | -33.3 | 1347.9 | -6.1 | 949.1 | -5.9 |
| $\omega$ B97X-D/6-311G(df,pd)    | 3204.6 | -30.0 | 1347.8 | -6.1 | 948.8 | -5.6 |
| $\omega$ B97X-D/6-311+G(df,pd)   | 3205.3 | -30.7 | 1346.9 | -5.2 | 948.4 | -5.2 |
| $\omega$ B97X-D/6-311++G(df,pd)  | 3205.2 | -30.6 | 1346.9 | -5.2 | 948.4 | -5.2 |
| $\omega$ B97X-D/6-311G(2df,2pd)  | 3214.6 | -39.9 | 1351.4 | -9.6 | 951.4 | -8.2 |
| $\omega$ B97X-D/6-311+G(2df,2pd) | 3215.3 | -40.6 | 1350.6 | -8.9 | 951.1 | -7.9 |

|                                   |        |       |        |       |       |      |
|-----------------------------------|--------|-------|--------|-------|-------|------|
| $\omega$ B97X-D/6-311++G(2df,2pd) | 3215.3 | -40.6 | 1350.6 | -8.9  | 951.1 | -7.9 |
| $\omega$ B97X-D/6-311G(3df,3pd)   | 3218.5 | -43.9 | 1352.6 | -10.9 | 952.4 | -9.1 |
| $\omega$ B97X-D/6-311+G(3df,3pd)  | 3218.9 | -44.2 | 1352.2 | -10.5 | 952.2 | -9.0 |
| $\omega$ B97X-D/6-311++G(3df,3pd) | 3218.8 | -44.2 | 1352.2 | -10.5 | 952.2 | -9.0 |
| $\omega$ B97X-D/cc-pVDZ           | 3171.5 | 3.1   | 1336.4 | 5.4   | 940.2 | 3.0  |
| $\omega$ B97X-D/aug-cc-pVDZ       | 3173.8 | 0.9   | 1336.1 | 5.7   | 940.3 | 3.0  |
| $\omega$ B97X-D/cc-pVTZ           | 3212.5 | -37.8 | 1350.2 | -8.5  | 950.7 | -7.4 |
| $\omega$ B97X-D/aug-cc-pVTZ       | 3213.3 | -38.7 | 1350.2 | -8.5  | 950.7 | -7.5 |
| PBE0/6-31G(d,p)                   | 3124.3 | 50.3  | 1322.9 | 18.9  | 929.4 | 13.9 |
| PBE0/6-31+G(d,p)                  | 3123.9 | 50.7  | 1321.1 | 20.6  | 928.5 | 14.8 |
| PBE0/6-31++G(d,p)                 | 3123.9 | 50.7  | 1321.2 | 20.6  | 928.5 | 14.8 |
| PBE0/6-311G(d,p)                  | 3136.4 | 38.3  | 1327.1 | 14.7  | 932.5 | 10.7 |
| PBE0/6-311+G(d,p)                 | 3137.0 | 37.6  | 1326.1 | 15.7  | 932.1 | 11.2 |
| PBE0/6-311++G(d,p)                | 3136.9 | 37.7  | 1326.1 | 15.7  | 932.1 | 11.2 |
| PBE0/6-311G(2d,2p)                | 3148.7 | 26.0  | 1331.1 | 10.6  | 935.6 | 7.6  |
| PBE0/6-311+G(2d,2p)               | 3149.9 | 24.7  | 1330.4 | 11.4  | 935.3 | 7.9  |
| PBE0/6-311++G(2d,2p)              | 3149.9 | 24.8  | 1330.4 | 11.4  | 935.3 | 7.9  |
| PBE0/6-311G(df,pd)                | 3145.6 | 29.1  | 1330.8 | 11.0  | 935.2 | 8.1  |
| PBE0/6-311+G(df,pd)               | 3146.3 | 28.3  | 1329.9 | 11.9  | 934.8 | 8.5  |
| PBE0/6-311G(2df,2pd)              | 3155.1 | 19.5  | 1334.0 | 7.8   | 937.6 | 5.7  |
| PBE0/6-311+G(2df,2pd)             | 3156.1 | 18.5  | 1333.2 | 8.6   | 937.3 | 6.0  |
| PBE0/6-311++G(2df,2pd)            | 3156.1 | 18.6  | 1333.2 | 8.6   | 937.3 | 6.0  |
| PBE0/6-311G(3df,3pd)              | 3159.9 | 14.8  | 1335.2 | 6.6   | 938.6 | 4.6  |
| PBE0/6-311+G(3df,3pd)             | 3161.0 | 13.7  | 1334.8 | 6.9   | 938.5 | 4.7  |
| PBE0/6-311++G(3df,3pd)            | 3160.4 | 14.2  | 1334.8 | 6.9   | 938.5 | 4.8  |
| PBE0/cc-pVDZ                      | 3114.1 | 60.5  | 1320.0 | 21.8  | 927.1 | 16.2 |
| PBE0/aug-cc-pVDZ                  | 3116.2 | 58.4  | 1319.3 | 22.5  | 926.9 | 16.3 |
| PBE0/cc-pVTZ                      | 3152.9 | 21.7  | 1332.6 | 9.1   | 936.7 | 6.5  |
| PBE0/aug-cc-pVTZ                  | 3153.5 | 21.1  | 1332.5 | 9.3   | 936.7 | 6.6  |
| PBE0-D3/6-31G(d,p)                | 3123.0 | 51.6  | 1322.9 | 18.9  | 929.3 | 13.9 |
| PBE0-D3/6-31+G(d,p)               | 3122.7 | 51.9  | 1321.2 | 20.6  | 928.4 | 14.8 |
| PBE0-D3/6-31++G(d,p)              | 3122.6 | 52.0  | 1321.2 | 20.6  | 928.4 | 14.8 |
| PBE0-D3/6-311G(d,p)               | 3135.0 | 39.6  | 1327.1 | 14.7  | 932.4 | 10.8 |
| PBE0-D3/6-311+G(d,p)              | 3135.8 | 38.8  | 1326.1 | 15.7  | 932.0 | 11.2 |
| PBE0-D3/6-311++G(d,p)             | 3135.6 | 39.0  | 1326.1 | 15.7  | 932.0 | 11.2 |
| PBE0-D3/6-311G(2d,2p)             | 3147.4 | 27.2  | 1331.2 | 10.6  | 935.5 | 7.7  |
| PBE0-D3/6-311+G(2d,2p)            | 3148.6 | 26.0  | 1330.4 | 11.4  | 935.2 | 8.0  |
| PBE0-D3/6-311++G(2d,2p)           | 3148.6 | 26.0  | 1330.4 | 11.4  | 935.2 | 8.0  |
| PBE0-D3/6-311G(df,pd)             | 3145.6 | 29.0  | 1330.8 | 11.0  | 935.2 | 8.0  |
| PBE0-D3/6-311+G(df,pd)            | 3146.3 | 28.3  | 1329.8 | 12.0  | 934.8 | 8.4  |
| PBE0-D3/6-311G(2df,2pd)           | 3155.1 | 19.5  | 1334.0 | 7.8   | 937.6 | 5.6  |

|                              |        |       |        |       |       |       |
|------------------------------|--------|-------|--------|-------|-------|-------|
| PBE0-D3/6-311+G(2df,2pd)     | 3156.1 | 18.5  | 1333.2 | 8.6   | 937.3 | 5.9   |
| PBE0-D3/6-311++G(2df,2pd)    | 3156.1 | 18.5  | 1333.2 | 8.6   | 937.3 | 5.9   |
| PBE0-D3/6-311G(3df,3pd)      | 3159.9 | 14.7  | 1335.2 | 6.6   | 938.6 | 4.6   |
| PBE0-D3/6-311+G(3df,3pd)     | 3161.0 | 13.6  | 1334.8 | 7.0   | 938.5 | 4.7   |
| PBE0-D3/6-311++G(3df,3pd)    | 3160.4 | 14.2  | 1334.8 | 7.0   | 938.5 | 4.7   |
| PBE0-D3/cc-pVDZ              | 3114.1 | 60.5  | 1320.0 | 21.8  | 927.1 | 16.1  |
| PBE0-D3/aug-cc-pVDZ          | 3116.2 | 58.4  | 1319.3 | 22.5  | 926.9 | 16.3  |
| PBE0-D3/cc-pVTZ              | 3152.9 | 21.7  | 1332.6 | 9.2   | 936.7 | 6.5   |
| PBE0-D3/aug-cc-pVTZ          | 3153.5 | 21.1  | 1332.4 | 9.4   | 936.7 | 6.5   |
| MN15/6-31G(d,p)              | 3184.8 | -10.1 | 1339.9 | 1.9   | 943.1 | 0.1   |
| MN15/6-31+G(d,p)             | 3183.8 | -9.2  | 1338.3 | 3.5   | 942.2 | 1.0   |
| MN15/6-31++G(d,p)            | 3183.8 | -9.1  | 1338.3 | 3.5   | 942.2 | 1.0   |
| MN15/6-311G(d,p)             | 3198.2 | -23.6 | 1344.5 | -2.8  | 946.6 | -3.3  |
| MN15/6-311+G(d,p)            | 3198.4 | -23.7 | 1343.7 | -2.0  | 946.2 | -3.0  |
| MN15/6-311++G(d,p)           | 3198.3 | -23.7 | 1343.7 | -1.9  | 946.2 | -3.0  |
| MN15/6-311G(2d,2p)           | 3210.7 | -36.1 | 1349.0 | -7.3  | 949.9 | -6.7  |
| MN15/6-311+G(2d,2p)          | 3211.2 | -36.6 | 1348.3 | -6.5  | 949.6 | -6.4  |
| MN15/6-311++G(2d,2p)         | 3211.2 | -36.6 | 1348.3 | -6.5  | 949.6 | -6.4  |
| MN15/6-311G(df,pd)           | 3210.9 | -36.3 | 1349.1 | -7.3  | 949.9 | -6.7  |
| MN15/6-311+G(df,pd)          | 3211.1 | -36.5 | 1348.1 | -6.4  | 949.5 | -6.3  |
| MN15/6-311G(2df,2pd)         | 3218.5 | -43.9 | 1351.8 | -10.0 | 952.0 | -8.7  |
| MN15/6-311+G(2df,2pd)        | 3219.6 | -45.0 | 1351.2 | -9.5  | 951.8 | -8.6  |
| MN15/6-311++G(2df,2pd)       | 3219.6 | -45.0 | 1351.2 | -9.5  | 951.8 | -8.6  |
| MN15/6-311G(3df,3pd)         | 3224.4 | -49.8 | 1353.5 | -11.7 | 953.3 | -10.1 |
| MN15/6-311+G(3df,3pd)        | 3224.4 | -49.7 | 1353.0 | -11.2 | 953.1 | -9.8  |
| MN15/6-311++G(3df,3pd)       | 3224.4 | -49.8 | 1353.0 | -11.2 | 953.1 | -9.8  |
| MN15/cc-pVDZ                 | 3176.4 | -1.7  | 1336.9 | 4.9   | 940.9 | 2.3   |
| MN15/aug-cc-pVDZ             | 3177.4 | -2.8  | 1337.2 | 4.6   | 941.1 | 2.1   |
| MN15/cc-pVTZ                 | 3219.2 | -44.6 | 1351.5 | -9.7  | 951.9 | -8.7  |
| MN15/aug-cc-pVTZ             | 3220.8 | -46.2 | 1352.5 | -10.8 | 952.5 | -9.3  |
| CAM-B3LYP-D3BJ/6-311G(d,p)   | 3202.4 | -27.8 | 1345.5 | -3.7  | 947.4 | -4.2  |
| CAM-B3LYP-D3BJ/6-311+G(d,p)  | 3202.8 | -28.2 | 1344.6 | -2.8  | 947.0 | -3.8  |
| CAM-B3LYP-D3BJ/6-311++G(d,p) | 3202.7 | -28.1 | 1344.6 | -2.8  | 947.0 | -3.8  |
| CAM-B3LYP-D3BJ/cc-pVDZ       | 3179.0 | -4.4  | 1337.5 | 4.2   | 941.4 | 1.8   |
| CAM-B3LYP-D3BJ/aug-cc-pVDZ   | 3181.4 | -6.8  | 1337.2 | 4.6   | 941.5 | 1.8   |
| CAM-B3LYP-D3BJ/cc-pVTZ       | 3221.3 | -46.6 | 1351.5 | -9.7  | 952.0 | -8.8  |
| CAM-B3LYP-D3BJ/aug-cc-pVTZ   | 3221.9 | -47.3 | 1351.3 | -9.5  | 952.0 | -8.8  |
| CCSD/cc-pVDZ                 | 3124.9 | 49.7  | 1318.5 | 23.2  | 927.3 | 16.0  |
| Experimental ( $X_0$ )       | 3174.6 |       | 1341.8 |       | 943.2 |       |

**Table S2.** Geometry parameters in the principal axes of inertia of benzothiazole calculated at the MP2/6-31G(d,p), MP2/6-311++G(d,p), and B3LYP-D3BJ/6-311++G(d,p) levels of theory. The atoms are numbered according to Figure 1.

|     | MP2/6-31G(d,p) |             |             | MP2/6-311++G(d,p) |             |             | B3LYP-D3BJ/6-311++G(d,p) |             |             |
|-----|----------------|-------------|-------------|-------------------|-------------|-------------|--------------------------|-------------|-------------|
|     | <i>a</i> /Å    | <i>b</i> /Å | <i>c</i> /Å | <i>a</i> /Å       | <i>b</i> /Å | <i>c</i> /Å | <i>a</i> /Å              | <i>b</i> /Å | <i>c</i> /Å |
| S1  | 1.75670        | 0.90336     | 0.00006     | 1.79115           | 0.94210     | −0.00043    | −1.78438                 | 0.93513     | −0.00004    |
| C2  | 2.05502        | −0.81055    | −0.00009    | 2.10968           | −0.79468    | 0.00034     | −2.11102                 | −0.77361    | 0.00011     |
| N3  | 1.01250        | −1.59911    | 0.00001     | 1.08179           | −1.57085    | −0.00002    | −1.08169                 | −1.57932    | 0.00000     |
| C4  | −0.14355       | −0.83554    | 0.00001     | −0.09354          | −0.83246    | 0.00001     | 0.08684                  | −0.83498    | −0.00001    |
| C5  | −1.45184       | −1.35574    | 0.00003     | −1.38598          | −1.36934    | 0.00006     | 1.38634                  | −1.37675    | −0.00004    |
| C6  | −2.52439       | −0.47098    | 0.00004     | −2.47086          | −0.50613    | 0.00019     | 2.47338                  | −0.50986    | −0.00006    |
| C7  | −2.31345       | 0.92663     | −0.00003    | −2.28560          | 0.88608     | 0.00023     | 2.28559                  | 0.89105     | 0.00001     |
| C8  | −1.02856       | 1.46307     | −0.00002    | −1.01194          | 1.44000     | 0.00015     | 1.00976                  | 1.44868     | 0.00001     |
| C9  | 0.05722        | 0.56993     | −0.00009    | 0.07963           | 0.57115     | 0.00004     | −0.09065                 | 0.57362     | 0.00009     |
| H10 | 3.07678        | −1.17559    | −0.00013    | 3.13339           | −1.14614    | 0.00029     | −3.13868                 | −1.12169    | 0.00016     |
| H11 | −1.59591       | −2.43233    | 0.00007     | −1.51298          | −2.44467    | 0.00004     | 1.51258                  | −2.45558    | −0.00008    |
| H12 | −3.54025       | −0.85605    | 0.00006     | −3.47666          | −0.90870    | 0.00023     | 3.48273                  | −0.91168    | −0.00009    |
| H13 | −3.16880       | 1.59683     | −0.00001    | −3.14929          | 1.54035     | 0.00027     | 3.15192                  | 1.54701     | −0.00002    |
| H14 | −0.87295       | 2.53812     | −0.00005    | −0.87377          | 2.51393     | 0.00008     | 0.87196                  | 2.52616     | 0.00004     |

**Table S3a.** Calculated ( $\nu_{calc}$ ) and observed ( $\nu_{obs}$ ) frequencies of the main species of benzothiazole.  $\nu_{obs} - \nu_{calc}$  values are obtained after a fit with the program *XIAM*.  $J$ ,  $K_a$ , and  $K_c$  are the symmetric top rotational quantum numbers.  $F$  is the total angular momentum in the coupled basis with  $F = J + I$ .

| N° | $J$ | $K_a$ | $K_c$ | $F$ | $J$ | $K_a$ | $K_c$ | $F$ | $\nu_{obs}$ / MHz | $\nu_{obs} - \nu_{calc}$ / kHz |
|----|-----|-------|-------|-----|-----|-------|-------|-----|-------------------|--------------------------------|
| 1  | 1   | 1     | 1     | 2   | 0   | 0     | 0     | 1   | 4118.0679         | 1.5                            |
| 2  | 1   | 1     | 1     | 1   | 0   | 0     | 0     | 1   | 4116.8446         | -0.2                           |
| 3  | 1   | 1     | 1     | 0   | 0   | 0     | 0     | 1   | 4119.8990         | 0.3                            |
| 4  | 2   | 0     | 2     | 3   | 1   | 0     | 1     | 2   | 4511.8047         | -0.2                           |
| 5  | 2   | 0     | 2     | 2   | 1   | 0     | 1     | 1   | 4511.6282         | -0.4                           |
| 6  | 2   | 0     | 2     | 1   | 1   | 0     | 1     | 0   | 4512.3594         | 2.8                            |
| 7  | 2   | 2     | 1     | 3   | 1   | 1     | 0     | 2   | 10467.3588        | 1.7                            |
| 8  | 2   | 2     | 1     | 2   | 1   | 1     | 0     | 2   | 10466.8420        | -0.1                           |
| 9  | 2   | 2     | 1     | 2   | 1   | 1     | 0     | 1   | 10466.1020        | 0.8                            |
| 10 | 2   | 2     | 1     | 1   | 1   | 1     | 0     | 1   | 10466.9017        | -0.5                           |
| 11 | 2   | 2     | 1     | 1   | 1   | 1     | 0     | 0   | 10468.7544        | -0.2                           |
| 12 | 2   | 2     | 0     | 3   | 1   | 1     | 1     | 2   | 10923.7182        | 1.5                            |
| 13 | 2   | 2     | 0     | 2   | 1   | 1     | 1     | 2   | 10923.4116        | -0.8                           |
| 14 | 2   | 2     | 0     | 2   | 1   | 1     | 1     | 1   | 10924.6342        | 0.2                            |
| 15 | 2   | 2     | 0     | 1   | 1   | 1     | 1     | 1   | 10925.1068        | -0.7                           |
| 16 | 2   | 2     | 0     | 1   | 1   | 1     | 1     | 0   | 10922.0533        | -0.3                           |
| 17 | 2   | 2     | 1     | 3   | 2   | 1     | 2     | 3   | 6694.1269         | 0.4                            |
| 18 | 2   | 2     | 1     | 3   | 2   | 1     | 2     | 2   | 6694.9220         | 1.7                            |
| 19 | 2   | 2     | 1     | 2   | 2   | 1     | 2     | 3   | 6693.6114         | -0.1                           |
| 20 | 2   | 2     | 1     | 2   | 2   | 1     | 2     | 2   | 6694.4049         | -0.5                           |
| 21 | 2   | 2     | 1     | 2   | 2   | 1     | 2     | 1   | 6693.1715         | 1.0                            |
| 22 | 2   | 2     | 1     | 1   | 2   | 1     | 2     | 2   | 6695.2059         | -0.5                           |
| 23 | 2   | 2     | 1     | 1   | 2   | 1     | 2     | 1   | 6693.9715         | 0.0                            |
| 24 | 3   | 1     | 3     | 4   | 2   | 1     | 2     | 3   | 6223.1441         | 0.1                            |
| 25 | 3   | 1     | 3     | 3   | 2   | 1     | 2     | 2   | 6223.1862         | 0.1                            |
| 26 | 3   | 1     | 3     | 2   | 2   | 1     | 2     | 1   | 6222.9633         | -2.7                           |
| 27 | 3   | 1     | 3     | 4   | 2   | 0     | 2     | 3   | 7715.9238         | 0.4                            |
| 28 | 3   | 1     | 3     | 3   | 2   | 0     | 2     | 3   | 7715.1718         | 0.2                            |
| 29 | 3   | 1     | 3     | 3   | 2   | 0     | 2     | 2   | 7714.8676         | 0.3                            |
| 30 | 3   | 1     | 3     | 2   | 2   | 0     | 2     | 1   | 7716.3562         | 0.5                            |
| 31 | 3   | 2     | 2     | 4   | 2   | 2     | 1     | 3   | 6854.8730         | -1.2                           |
| 32 | 3   | 2     | 2     | 3   | 2   | 2     | 1     | 2   | 6855.3861         | -3.0                           |
| 33 | 3   | 2     | 2     | 2   | 2   | 2     | 1     | 1   | 6854.5878         | -0.3                           |
| 34 | 3   | 2     | 2     | 4   | 2   | 1     | 1     | 3   | 12353.8733        | 0.3                            |
| 35 | 3   | 2     | 2     | 3   | 2   | 1     | 1     | 2   | 12352.5617        | -2.5                           |
| 36 | 3   | 2     | 2     | 2   | 2   | 1     | 1     | 1   | 12354.6008        | 0.7                            |
| 37 | 3   | 2     | 1     | 4   | 2   | 1     | 2     | 3   | 13832.0963        | 1.1                            |

|    |   |   |   |   |   |   |   |   |            |      |
|----|---|---|---|---|---|---|---|---|------------|------|
| 38 | 3 | 2 | 1 | 3 | 2 | 1 | 2 | 3 | 13832.6108 | -1.6 |
| 39 | 3 | 2 | 1 | 3 | 2 | 1 | 2 | 2 | 13833.4059 | -0.4 |
| 40 | 3 | 2 | 1 | 2 | 2 | 1 | 2 | 2 | 13832.7074 | -0.7 |
| 41 | 3 | 2 | 1 | 2 | 2 | 1 | 2 | 1 | 13831.4725 | -0.7 |
| 42 | 3 | 3 | 0 | 4 | 2 | 2 | 1 | 3 | 17055.1071 | 0.8  |
| 43 | 3 | 3 | 0 | 3 | 2 | 2 | 1 | 3 | 17054.5143 | -1.9 |
| 44 | 3 | 3 | 0 | 3 | 2 | 2 | 1 | 2 | 17055.0305 | -0.6 |
| 45 | 3 | 3 | 0 | 2 | 2 | 2 | 1 | 2 | 17055.8256 | -2.2 |
| 46 | 3 | 1 | 2 | 4 | 3 | 0 | 3 | 4 | 3471.1594  | 1.0  |
| 47 | 3 | 1 | 2 | 4 | 3 | 0 | 3 | 3 | 3471.1370  | -4.6 |
| 48 | 3 | 1 | 2 | 3 | 3 | 0 | 3 | 3 | 3472.5544  | -0.6 |
| 49 | 3 | 1 | 2 | 2 | 3 | 0 | 3 | 2 | 3470.6697  | 0.0  |
| 50 | 3 | 2 | 2 | 4 | 3 | 1 | 3 | 4 | 7325.8561  | -0.6 |
| 51 | 3 | 2 | 2 | 3 | 3 | 1 | 3 | 3 | 7326.6055  | -2.9 |
| 52 | 3 | 2 | 2 | 2 | 3 | 1 | 3 | 2 | 7325.5930  | -0.6 |
| 53 | 3 | 3 | 0 | 4 | 3 | 2 | 1 | 4 | 9917.1386  | 1.0  |
| 54 | 3 | 3 | 0 | 4 | 3 | 2 | 1 | 3 | 9916.6213  | 1.0  |
| 55 | 3 | 3 | 0 | 3 | 3 | 2 | 1 | 4 | 9916.5462  | -1.2 |
| 56 | 3 | 3 | 0 | 3 | 3 | 2 | 1 | 3 | 9916.0298  | -0.4 |
| 57 | 3 | 3 | 0 | 3 | 3 | 2 | 1 | 2 | 9916.7313  | 2.9  |
| 58 | 3 | 3 | 0 | 2 | 3 | 2 | 1 | 3 | 9916.8240  | -2.9 |
| 59 | 3 | 3 | 0 | 2 | 3 | 2 | 1 | 2 | 9917.5238  | -1.3 |
| 60 | 3 | 3 | 1 | 4 | 3 | 2 | 2 | 4 | 10194.8566 | 1.8  |
| 61 | 3 | 3 | 1 | 3 | 3 | 2 | 2 | 3 | 10194.2510 | 1.8  |
| 62 | 3 | 3 | 1 | 2 | 3 | 2 | 2 | 2 | 10195.0654 | -1.3 |
| 63 | 4 | 0 | 4 | 5 | 3 | 1 | 3 | 4 | 7534.1955  | -0.2 |
| 64 | 4 | 0 | 4 | 4 | 3 | 1 | 3 | 3 | 7534.6401  | 1.3  |
| 65 | 4 | 0 | 4 | 3 | 3 | 1 | 3 | 2 | 7534.0146  | 2.7  |
| 66 | 4 | 1 | 3 | 5 | 3 | 1 | 2 | 4 | 9803.2122  | 0.7  |
| 67 | 4 | 1 | 3 | 4 | 3 | 1 | 2 | 3 | 9803.1649  | 0.2  |
| 68 | 4 | 1 | 3 | 3 | 3 | 1 | 2 | 2 | 9803.3542  | -0.6 |
| 69 | 4 | 1 | 4 | 5 | 3 | 1 | 3 | 4 | 8240.9492  | -0.1 |
| 70 | 4 | 1 | 4 | 4 | 3 | 1 | 3 | 3 | 8240.9039  | 1.5  |
| 71 | 4 | 1 | 4 | 3 | 3 | 1 | 3 | 2 | 8240.8899  | -1.7 |
| 72 | 4 | 2 | 2 | 5 | 3 | 2 | 1 | 4 | 9613.9025  | -0.1 |
| 73 | 4 | 2 | 2 | 4 | 3 | 2 | 1 | 3 | 9614.4051  | 0.1  |
| 74 | 4 | 2 | 2 | 3 | 3 | 2 | 1 | 2 | 9613.8223  | 0.9  |
| 75 | 4 | 2 | 3 | 5 | 3 | 2 | 2 | 4 | 9094.4321  | 1.2  |
| 76 | 4 | 2 | 3 | 4 | 3 | 2 | 2 | 3 | 9094.5991  | 2.4  |
| 77 | 4 | 2 | 3 | 3 | 3 | 2 | 2 | 2 | 9094.3887  | 0.4  |
| 78 | 4 | 3 | 1 | 5 | 3 | 3 | 0 | 4 | 9273.6481  | -0.5 |
| 79 | 4 | 3 | 1 | 4 | 3 | 3 | 0 | 3 | 9274.2603  | 0.0  |
| 80 | 4 | 3 | 1 | 3 | 3 | 3 | 0 | 2 | 9273.4363  | -0.3 |
| 81 | 4 | 3 | 1 | 5 | 3 | 2 | 2 | 4 | 19473.8834 | 2.6  |
| 82 | 4 | 3 | 1 | 4 | 3 | 2 | 2 | 3 | 19473.9081 | 5.9  |



|     |   |   |   |   |   |   |   |   |            |      |
|-----|---|---|---|---|---|---|---|---|------------|------|
| 83  | 4 | 3 | 1 | 3 | 3 | 2 | 2 | 2 | 19473.8727 | -2.6 |
| 84  | 4 | 2 | 2 | 5 | 4 | 1 | 3 | 5 | 5034.3772  | 1.1  |
| 85  | 4 | 2 | 2 | 4 | 4 | 1 | 3 | 4 | 5034.0294  | 0.2  |
| 86  | 4 | 2 | 2 | 3 | 4 | 1 | 3 | 3 | 5034.4654  | 0.0  |
| 87  | 5 | 0 | 5 | 6 | 4 | 0 | 4 | 5 | 10512.3878 | 0.1  |
| 88  | 5 | 0 | 5 | 5 | 4 | 0 | 4 | 4 | 10512.0977 | -1.0 |
| 89  | 5 | 0 | 5 | 4 | 4 | 0 | 4 | 3 | 10512.4276 | -2.6 |
| 90  | 5 | 0 | 5 | 6 | 4 | 1 | 4 | 5 | 9805.6339  | -0.3 |
| 91  | 5 | 0 | 5 | 5 | 4 | 1 | 4 | 4 | 9805.8352  | 0.2  |
| 92  | 5 | 0 | 5 | 4 | 4 | 1 | 4 | 3 | 9805.5512  | 0.7  |
| 93  | 5 | 1 | 4 | 6 | 4 | 1 | 3 | 5 | 12108.2372 | 0.6  |
| 94  | 5 | 1 | 4 | 5 | 4 | 1 | 3 | 4 | 12108.0896 | -0.8 |
| 95  | 5 | 1 | 4 | 5 | 4 | 1 | 3 | 5 | 12109.4566 | -0.4 |
| 96  | 5 | 1 | 4 | 4 | 4 | 1 | 3 | 3 | 12108.3399 | 0.5  |
| 97  | 5 | 1 | 5 | 6 | 4 | 1 | 4 | 5 | 10223.5744 | 0.2  |
| 98  | 5 | 1 | 5 | 5 | 4 | 1 | 4 | 4 | 10223.4977 | 0.7  |
| 99  | 5 | 1 | 5 | 4 | 4 | 1 | 4 | 3 | 10223.5461 | -1.1 |
| 100 | 5 | 1 | 5 | 6 | 4 | 0 | 4 | 5 | 10930.3283 | 0.5  |
| 101 | 5 | 1 | 5 | 5 | 4 | 0 | 4 | 4 | 10929.7595 | -1.2 |
| 102 | 5 | 1 | 5 | 4 | 4 | 0 | 4 | 3 | 10930.4237 | -3.1 |
| 103 | 5 | 2 | 3 | 6 | 4 | 2 | 2 | 5 | 12205.1819 | 1.0  |
| 104 | 5 | 2 | 3 | 5 | 4 | 2 | 2 | 4 | 12205.5047 | 0.3  |
| 105 | 5 | 2 | 3 | 4 | 4 | 2 | 2 | 3 | 12205.1684 | -1.1 |
| 106 | 5 | 2 | 4 | 6 | 4 | 2 | 3 | 5 | 11295.8664 | 0.7  |
| 107 | 5 | 2 | 4 | 5 | 4 | 2 | 3 | 4 | 11295.8981 | 1.5  |
| 108 | 5 | 3 | 3 | 6 | 4 | 3 | 2 | 5 | 11574.9128 | -0.9 |
| 109 | 5 | 3 | 3 | 5 | 4 | 3 | 2 | 4 | 11575.2111 | -0.8 |
| 110 | 5 | 3 | 3 | 4 | 4 | 3 | 2 | 3 | 11574.8500 | -0.6 |
| 111 | 5 | 3 | 3 | 6 | 4 | 2 | 2 | 5 | 21114.6092 | 0.7  |
| 112 | 5 | 3 | 3 | 5 | 4 | 2 | 2 | 4 | 21113.8427 | -1.0 |
| 113 | 5 | 3 | 3 | 4 | 4 | 2 | 2 | 3 | 21114.8178 | -1.0 |
| 114 | 6 | 0 | 6 | 7 | 5 | 0 | 5 | 6 | 12363.0622 | -0.5 |
| 115 | 6 | 0 | 6 | 6 | 5 | 0 | 5 | 5 | 12362.8427 | -0.4 |
| 116 | 6 | 0 | 6 | 5 | 5 | 0 | 5 | 4 | 12363.0808 | 1.8  |
| 117 | 6 | 0 | 6 | 7 | 5 | 1 | 5 | 6 | 11945.1229 | 0.2  |
| 118 | 6 | 0 | 6 | 6 | 5 | 1 | 5 | 5 | 11945.1810 | -0.2 |
| 119 | 6 | 0 | 6 | 5 | 5 | 1 | 5 | 4 | 11945.0827 | 0.4  |
| 120 | 6 | 1 | 6 | 7 | 5 | 1 | 5 | 6 | 12174.8894 | 0.9  |
| 121 | 6 | 1 | 6 | 6 | 5 | 1 | 5 | 5 | 12174.8036 | 0.4  |
| 122 | 6 | 1 | 6 | 5 | 5 | 1 | 5 | 4 | 12174.8716 | -0.8 |
| 123 | 6 | 1 | 6 | 7 | 5 | 0 | 5 | 6 | 12592.8290 | 0.5  |
| 124 | 6 | 1 | 6 | 6 | 5 | 0 | 5 | 5 | 12592.4651 | -0.1 |
| 125 | 6 | 1 | 6 | 5 | 5 | 0 | 5 | 4 | 12592.8681 | -1.0 |
| 126 | 6 | 2 | 4 | 7 | 5 | 2 | 3 | 6 | 14784.3563 | -0.6 |
| 127 | 6 | 2 | 4 | 6 | 5 | 2 | 3 | 5 | 14784.5307 | 0.4  |

|     |   |   |   |   |   |   |   |   |            |      |
|-----|---|---|---|---|---|---|---|---|------------|------|
| 128 | 6 | 2 | 4 | 5 | 5 | 2 | 3 | 4 | 14784.3769 | 2.5  |
| 129 | 6 | 2 | 4 | 7 | 6 | 1 | 5 | 7 | 5621.0560  | 0.5  |
| 130 | 6 | 2 | 4 | 6 | 6 | 1 | 5 | 6 | 5621.5801  | -0.5 |
| 131 | 6 | 2 | 4 | 5 | 6 | 1 | 5 | 5 | 5620.9651  | -1.7 |
| 132 | 6 | 3 | 3 | 7 | 6 | 2 | 4 | 7 | 8443.9111  | 0.6  |
| 133 | 6 | 3 | 3 | 6 | 6 | 2 | 4 | 6 | 8443.1536  | 0.5  |
| 134 | 6 | 3 | 3 | 5 | 6 | 2 | 4 | 5 | 8444.0383  | 0.0  |
| 135 | 7 | 0 | 7 | 8 | 6 | 1 | 6 | 7 | 13981.8762 | 2.2  |
| 136 | 7 | 0 | 7 | 7 | 6 | 1 | 6 | 6 | 13981.8613 | 0.2  |
| 137 | 7 | 0 | 7 | 6 | 6 | 1 | 6 | 5 | 13981.8498 | -2.4 |
| 138 | 7 | 1 | 7 | 8 | 6 | 0 | 6 | 7 | 14331.5410 | -1.2 |
| 139 | 7 | 1 | 7 | 7 | 6 | 0 | 6 | 6 | 14331.3157 | -0.1 |
| 140 | 7 | 1 | 7 | 6 | 6 | 0 | 6 | 5 | 14331.5564 | 1.7  |
| 141 | 7 | 3 | 4 | 8 | 6 | 3 | 3 | 7 | 16761.4171 | 1.2  |
| 142 | 7 | 3 | 4 | 7 | 6 | 3 | 3 | 6 | 16761.7264 | 1.2  |
| 143 | 7 | 3 | 4 | 6 | 6 | 3 | 3 | 5 | 16761.3874 | -2.5 |
| 144 | 7 | 3 | 5 | 8 | 6 | 3 | 4 | 7 | 16210.8442 | -1.1 |
| 145 | 7 | 3 | 5 | 7 | 6 | 3 | 4 | 6 | 16210.9314 | -0.8 |
| 146 | 7 | 2 | 5 | 8 | 7 | 1 | 6 | 8 | 6576.2589  | 0.4  |
| 147 | 7 | 2 | 5 | 7 | 7 | 1 | 6 | 7 | 6577.1209  | 0.1  |
| 148 | 7 | 2 | 5 | 6 | 7 | 1 | 6 | 6 | 6576.1335  | -0.6 |
| 149 | 7 | 2 | 6 | 8 | 7 | 1 | 7 | 8 | 11984.9376 | 0.9  |
| 150 | 7 | 2 | 6 | 7 | 7 | 1 | 7 | 7 | 11986.0628 | 0.1  |
| 151 | 7 | 2 | 6 | 6 | 7 | 1 | 7 | 6 | 11984.7745 | 0.2  |
| 152 | 7 | 3 | 5 | 8 | 7 | 2 | 6 | 8 | 11724.7717 | 0.3  |
| 153 | 7 | 3 | 5 | 7 | 7 | 2 | 6 | 7 | 11725.1989 | 0.3  |
| 154 | 7 | 3 | 5 | 6 | 7 | 2 | 6 | 6 | 11724.7101 | 0.3  |
| 155 | 7 | 4 | 3 | 8 | 7 | 3 | 4 | 8 | 13268.6735 | 0.1  |
| 156 | 7 | 4 | 3 | 7 | 7 | 3 | 4 | 7 | 13268.0038 | -0.5 |
| 157 | 7 | 4 | 3 | 6 | 7 | 3 | 4 | 6 | 13268.7690 | -0.8 |
| 158 | 8 | 0 | 8 | 9 | 7 | 1 | 7 | 8 | 15951.3896 | 2.4  |
| 159 | 8 | 0 | 8 | 8 | 7 | 1 | 7 | 7 | 15951.3462 | 1.5  |
| 160 | 8 | 0 | 8 | 7 | 7 | 1 | 7 | 6 | 15951.3695 | -4.0 |
| 161 | 8 | 1 | 8 | 9 | 7 | 0 | 7 | 8 | 16131.5730 | 0.1  |
| 162 | 8 | 1 | 8 | 8 | 7 | 0 | 7 | 7 | 16131.4287 | 0.7  |
| 163 | 8 | 2 | 6 | 9 | 7 | 3 | 5 | 8 | 12755.3359 | -0.8 |
| 164 | 8 | 2 | 6 | 8 | 7 | 3 | 5 | 7 | 12756.3421 | -0.4 |
| 165 | 8 | 2 | 6 | 7 | 7 | 3 | 5 | 6 | 12755.2192 | -0.2 |
| 166 | 8 | 1 | 7 | 9 | 8 | 0 | 8 | 9 | 12491.0778 | 0.7  |
| 167 | 8 | 1 | 7 | 8 | 8 | 0 | 8 | 8 | 12492.5642 | -0.5 |
| 168 | 8 | 1 | 7 | 7 | 8 | 0 | 8 | 7 | 12490.8898 | 0.0  |
| 169 | 8 | 3 | 5 | 9 | 8 | 2 | 6 | 9 | 7637.9407  | -0.6 |
| 170 | 8 | 3 | 5 | 8 | 8 | 2 | 6 | 8 | 7637.7623  | 0.4  |
| 171 | 8 | 3 | 5 | 7 | 8 | 2 | 6 | 7 | 7637.9653  | 1.4  |
| 172 | 8 | 3 | 6 | 9 | 8 | 2 | 7 | 9 | 12596.6194 | 0.8  |

|     |    |   |    |    |    |   |    |    |            |      |
|-----|----|---|----|----|----|---|----|----|------------|------|
| 173 | 8  | 3 | 6  | 8  | 8  | 2 | 7  | 8  | 12597.1745 | −0.1 |
| 174 | 8  | 3 | 6  | 7  | 8  | 2 | 7  | 7  | 12596.5481 | −0.5 |
| 175 | 8  | 4 | 4  | 9  | 8  | 3 | 5  | 9  | 12605.5233 | 0.1  |
| 176 | 8  | 4 | 4  | 8  | 8  | 3 | 5  | 8  | 12604.8111 | −0.3 |
| 177 | 8  | 4 | 4  | 7  | 8  | 3 | 5  | 7  | 12605.6122 | −0.7 |
| 178 | 9  | 0 | 9  | 10 | 8  | 1 | 8  | 9  | 17881.3569 | 1.5  |
| 179 | 9  | 0 | 9  | 9  | 8  | 1 | 8  | 8  | 17881.3056 | 1.4  |
| 180 | 9  | 0 | 9  | 8  | 8  | 1 | 8  | 7  | 17881.3439 | −1.4 |
| 181 | 9  | 1 | 9  | 10 | 8  | 0 | 8  | 9  | 17971.1238 | −1.6 |
| 182 | 9  | 1 | 9  | 9  | 8  | 0 | 8  | 8  | 17971.0265 | −0.4 |
| 183 | 9  | 4 | 5  | 10 | 9  | 3 | 6  | 10 | 11784.6518 | 0.8  |
| 184 | 9  | 4 | 5  | 9  | 9  | 3 | 6  | 9  | 11783.9679 | −0.5 |
| 185 | 9  | 4 | 5  | 8  | 9  | 3 | 6  | 8  | 11784.7271 | −0.2 |
| 186 | 10 | 0 | 10 | 11 | 9  | 1 | 9  | 10 | 19789.6560 | 1.2  |
| 187 | 10 | 0 | 10 | 10 | 9  | 1 | 9  | 9  | 19789.6061 | 1.7  |
| 188 | 10 | 0 | 10 | 9  | 9  | 1 | 9  | 8  | 19789.6456 | −0.9 |
| 189 | 10 | 1 | 10 | 11 | 9  | 0 | 9  | 10 | 19833.2605 | −3.1 |
| 190 | 10 | 1 | 10 | 10 | 9  | 0 | 9  | 9  | 19833.1957 | 3.8  |
| 191 | 11 | 1 | 11 | 12 | 10 | 0 | 10 | 11 | 21707.4399 | −3.0 |
| 192 | 11 | 1 | 11 | 11 | 10 | 0 | 10 | 10 | 21707.3905 | 3.1  |
| 193 | 12 | 1 | 12 | 13 | 11 | 0 | 11 | 12 | 23587.7688 | −6.5 |
| 194 | 12 | 1 | 12 | 12 | 11 | 0 | 11 | 11 | 23587.7357 | 5.4  |

**Table S3b.** Calculated ( $\nu_{calc}$ ) and observed ( $\nu_{obs}$ ) frequencies of the  $^{34}\text{S}$  isotopologue of benzothiazole.  $\nu_{obs} - \nu_{calc}$  values are obtained after a fit with the program *XIAM*.  $J$ ,  $K_a$ , and  $K_c$  are the symmetric top rotational quantum numbers.  $F$  is the total angular momentum in the coupled basis with  $F = J + I$ .

| N° | $J$ | $K_a$ | $K_c$ | $F$ | $J$ | $K_a$ | $K_c$ | $F$ | $\nu_{obs}/\text{MHz}$ | $\nu_{obs} - \nu_{calc}/\text{kHz}$ |
|----|-----|-------|-------|-----|-----|-------|-------|-----|------------------------|-------------------------------------|
| 1  | 1   | 1     | 1     | 2   | 0   | 0     | 0     | 1   | 4073.8683              | 0.6                                 |
| 2  | 2   | 2     | 1     | 3   | 1   | 1     | 0     | 2   | 10361.2277             | 1.3                                 |
| 3  | 2   | 2     | 1     | 2   | 1   | 1     | 0     | 2   | 10360.7126             | -0.3                                |
| 4  | 2   | 2     | 1     | 2   | 1   | 1     | 0     | 1   | 10359.9724             | 0.8                                 |
| 5  | 2   | 2     | 1     | 1   | 1   | 1     | 0     | 1   | 10360.7682             | -2.1                                |
| 6  | 2   | 2     | 1     | 1   | 1   | 1     | 0     | 0   | 10362.6227             | -0.9                                |
| 7  | 2   | 2     | 0     | 3   | 1   | 1     | 1     | 2   | 10807.6730             | 2.2                                 |
| 8  | 2   | 2     | 0     | 2   | 1   | 1     | 1     | 2   | 10807.3659             | 0.8                                 |
| 9  | 2   | 2     | 0     | 2   | 1   | 1     | 1     | 1   | 10808.5854             | -0.2                                |
| 10 | 2   | 2     | 0     | 1   | 1   | 1     | 1     | 1   | 10809.0620             | 0.6                                 |
| 11 | 2   | 2     | 0     | 1   | 1   | 1     | 1     | 0   | 10806.0101             | 0.1                                 |
| 12 | 2   | 2     | 1     | 3   | 2   | 1     | 2     | 3   | 6640.9282              | 2.2                                 |
| 13 | 2   | 2     | 1     | 3   | 2   | 1     | 2     | 2   | 6641.7232              | 3.0                                 |
| 14 | 3   | 2     | 2     | 4   | 2   | 1     | 1     | 3   | 12221.2770             | -0.2                                |
| 15 | 3   | 2     | 2     | 3   | 2   | 1     | 1     | 2   | 12219.9660             | -3.4                                |
| 16 | 3   | 2     | 2     | 2   | 2   | 1     | 1     | 1   | 12222.0028             | -0.9                                |
| 17 | 5   | 0     | 5     | 6   | 4   | 1     | 4     | 5   | 9653.5289              | -0.3                                |
| 18 | 5   | 0     | 5     | 5   | 4   | 1     | 4     | 4   | 9653.7366              | -0.1                                |
| 19 | 5   | 0     | 5     | 4   | 4   | 1     | 4     | 3   | 9653.4461              | 1.8                                 |
| 20 | 5   | 1     | 5     | 6   | 4   | 0     | 4     | 5   | 10789.7675             | -0.5                                |
| 21 | 5   | 1     | 5     | 5   | 4   | 0     | 4     | 4   | 10789.1935             | -1.6                                |
| 22 | 5   | 1     | 5     | 4   | 4   | 0     | 4     | 3   | 10789.8652             | -3.4                                |
| 23 | 6   | 0     | 6     | 7   | 5   | 1     | 5     | 6   | 11767.3898             | -0.1                                |
| 24 | 6   | 0     | 6     | 6   | 5   | 1     | 5     | 5   | 11767.4526             | -0.5                                |
| 25 | 6   | 0     | 6     | 5   | 5   | 1     | 5     | 4   | 11767.3502             | 1.4                                 |
| 26 | 6   | 1     | 6     | 7   | 5   | 0     | 5     | 6   | 12425.9663             | 0.6                                 |
| 27 | 6   | 1     | 6     | 6   | 5   | 0     | 5     | 5   | 12425.5961             | -0.9                                |
| 28 | 6   | 1     | 6     | 5   | 5   | 0     | 5     | 4   | 12426.0040             | -3.4                                |
| 29 | 6   | 1     | 6     | 7   | 5   | 1     | 5     | 6   | 12002.0181             | 3.5                                 |
| 30 | 6   | 1     | 6     | 6   | 5   | 1     | 5     | 5   | 12001.9273             | -2.6                                |
| 31 | 6   | 1     | 6     | 5   | 5   | 1     | 5     | 4   | 12001.9937             | -4.7                                |
| 32 | 6   | 4     | 2     | 7   | 6   | 3     | 3     | 7   | 13638.8364             | 1.0                                 |
| 33 | 6   | 4     | 2     | 6   | 6   | 3     | 3     | 6   | 13638.2268             | -1.2                                |
| 34 | 6   | 4     | 2     | 5   | 6   | 3     | 3     | 5   | 13638.9368             | -1.1                                |

|    |   |   |   |    |   |   |   |    |            |      |
|----|---|---|---|----|---|---|---|----|------------|------|
| 35 | 7 | 0 | 7 | 8  | 6 | 1 | 6 | 7  | 13779.2490 | 4.0  |
| 36 | 7 | 0 | 7 | 7  | 6 | 1 | 6 | 6  | 13779.2357 | 0.8  |
| 37 | 7 | 0 | 7 | 6  | 6 | 1 | 6 | 5  | 13779.2181 | -4.8 |
| 38 | 7 | 1 | 7 | 8  | 6 | 0 | 6 | 7  | 14137.1148 | -2.7 |
| 39 | 7 | 1 | 7 | 7  | 6 | 0 | 6 | 6  | 14136.8890 | 1.8  |
| 40 | 7 | 1 | 7 | 6  | 6 | 0 | 6 | 5  | 14137.1326 | 1.8  |
| 41 | 7 | 1 | 6 | 8  | 6 | 2 | 5 | 7  | 13511.6022 | -0.3 |
| 42 | 7 | 1 | 6 | 7  | 6 | 2 | 5 | 6  | 13512.1577 | -0.3 |
| 43 | 7 | 1 | 6 | 6  | 6 | 2 | 5 | 5  | 13511.5269 | 0.6  |
| 44 | 7 | 2 | 6 | 8  | 7 | 1 | 7 | 8  | 11825.6479 | 0.8  |
| 45 | 7 | 2 | 6 | 7  | 7 | 1 | 7 | 7  | 11826.7744 | 0.2  |
| 46 | 7 | 3 | 5 | 8  | 7 | 2 | 6 | 8  | 11609.5692 | -0.1 |
| 47 | 7 | 3 | 5 | 7  | 7 | 2 | 6 | 7  | 11609.9898 | -2.1 |
| 48 | 7 | 3 | 5 | 6  | 7 | 2 | 6 | 6  | 11609.5099 | 1.5  |
| 49 | 7 | 4 | 3 | 8  | 7 | 3 | 4 | 8  | 13207.0602 | 0.2  |
| 50 | 7 | 4 | 3 | 7  | 7 | 3 | 4 | 7  | 13206.3977 | -0.2 |
| 51 | 7 | 4 | 3 | 6  | 7 | 3 | 4 | 6  | 13207.1559 | 0.4  |
| 52 | 8 | 0 | 8 | 9  | 7 | 1 | 7 | 8  | 15723.7496 | 2.3  |
| 53 | 8 | 0 | 8 | 8  | 7 | 1 | 7 | 7  | 15723.7112 | 5.0  |
| 54 | 8 | 0 | 8 | 7  | 7 | 1 | 7 | 6  | 15723.7278 | -5.6 |
| 55 | 8 | 1 | 8 | 9  | 7 | 0 | 7 | 8  | 15909.3661 | 1.0  |
| 56 | 8 | 1 | 8 | 8  | 7 | 0 | 7 | 7  | 15909.2152 | -2.5 |
| 57 | 8 | 2 | 6 | 9  | 7 | 3 | 5 | 8  | 12445.8887 | 3.1  |
| 58 | 8 | 2 | 6 | 8  | 7 | 3 | 5 | 7  | 12446.8950 | -1.4 |
| 59 | 8 | 2 | 6 | 7  | 7 | 3 | 5 | 6  | 12445.7646 | -3.0 |
| 60 | 8 | 1 | 7 | 9  | 8 | 0 | 8 | 9  | 12281.0967 | 1.6  |
| 61 | 8 | 1 | 7 | 8  | 8 | 0 | 8 | 8  | 12282.5947 | 1.2  |
| 62 | 8 | 1 | 7 | 7  | 8 | 0 | 8 | 7  | 12280.9045 | -1.9 |
| 63 | 8 | 2 | 7 | 9  | 8 | 1 | 8 | 9  | 13398.5487 | 2.7  |
| 64 | 8 | 2 | 7 | 8  | 8 | 1 | 8 | 8  | 13399.6477 | -2.1 |
| 65 | 8 | 2 | 7 | 7  | 8 | 1 | 8 | 7  | 13398.4039 | -3.1 |
| 66 | 8 | 3 | 6 | 9  | 8 | 2 | 7 | 9  | 12457.8089 | 1.5  |
| 67 | 8 | 3 | 6 | 8  | 8 | 2 | 7 | 8  | 12458.3582 | -0.7 |
| 68 | 8 | 3 | 6 | 7  | 8 | 2 | 7 | 7  | 12457.7377 | -0.3 |
| 69 | 8 | 4 | 4 | 9  | 8 | 3 | 5 | 9  | 12563.4442 | 0.4  |
| 70 | 8 | 4 | 4 | 8  | 8 | 3 | 5 | 8  | 12562.7348 | -1.4 |
| 71 | 8 | 4 | 4 | 7  | 8 | 3 | 5 | 7  | 12563.5325 | -0.4 |
| 72 | 9 | 0 | 9 | 10 | 8 | 1 | 8 | 9  | 17628.3241 | 2.2  |
| 73 | 9 | 0 | 9 | 9  | 8 | 1 | 8 | 8  | 17628.2758 | 4.4  |
| 74 | 9 | 0 | 9 | 8  | 8 | 1 | 8 | 7  | 17628.3103 | -1.4 |
| 75 | 9 | 1 | 9 | 10 | 8 | 0 | 8 | 9  | 17721.3966 | 0.2  |
| 76 | 9 | 1 | 9 | 9  | 8 | 0 | 8 | 8  | 17721.2966 | 0.2  |
| 77 | 9 | 3 | 7 | 10 | 9 | 2 | 8 | 10 | 13522.3451 | 1.8  |

|    |    |   |    |    |    |   |    |    |            |      |
|----|----|---|----|----|----|---|----|----|------------|------|
| 78 | 9  | 3 | 7  | 9  | 9  | 2 | 8  | 9  | 13522.9894 | −1.6 |
| 79 | 9  | 3 | 7  | 8  | 9  | 2 | 8  | 8  | 13522.2701 | −0.8 |
| 80 | 9  | 4 | 5  | 10 | 9  | 3 | 6  | 10 | 11759.5990 | −1.3 |
| 81 | 9  | 4 | 5  | 9  | 9  | 3 | 6  | 9  | 11758.9182 | 2.4  |
| 82 | 9  | 4 | 5  | 8  | 9  | 3 | 6  | 8  | 11759.6788 | 2.0  |
| 83 | 10 | 0 | 10 | 11 | 9  | 1 | 9  | 10 | 19510.8552 | 1.0  |
| 84 | 10 | 0 | 10 | 10 | 9  | 1 | 9  | 9  | 19510.8108 | 6.8  |
| 85 | 10 | 0 | 10 | 9  | 9  | 1 | 9  | 8  | 19510.8457 | −0.2 |
| 86 | 10 | 1 | 10 | 11 | 9  | 0 | 9  | 10 | 19556.3608 | 2.2  |
| 87 | 10 | 1 | 10 | 10 | 9  | 0 | 9  | 9  | 19556.2871 | 1.2  |
| 88 | 10 | 3 | 7  | 11 | 9  | 4 | 6  | 10 | 13022.9281 | 0.8  |
| 89 | 10 | 3 | 7  | 10 | 9  | 4 | 6  | 9  | 13023.9482 | 0.6  |
| 90 | 10 | 3 | 7  | 9  | 9  | 4 | 6  | 8  | 13022.8314 | −0.2 |
| 91 | 11 | 1 | 11 | 12 | 10 | 0 | 10 | 11 | 21403.6364 | −1.8 |
| 92 | 12 | 1 | 12 | 13 | 11 | 0 | 11 | 12 | 23257.2487 | −6.7 |
